# Supplementary material for: Chemerin Impairs In Vitro Testosterone Production, Sperm Motility, and Fertility in Chicken: Possible Involvement of Its Receptor CMKLR1
Source: MDPI journal article supplement (doi:10.3390/cells9071599), 2020-07-01
Supplement: s1 [file s1]

| Parameter                        | Time          | Control      | Chemerin 50<br>ng/ml | Chemerin 150<br>ng/ml | Chemerin 500<br>ng/ml | Chicken CMKLR1 Ab<br>(10 µg/ml) | Chicken CMKLR1 Ab<br>(10 µg/ml)<br>+ Chemerin 500 ng/ml |
|----------------------------------|---------------|--------------|----------------------|-----------------------|-----------------------|---------------------------------|---------------------------------------------------------|
| Dead (SYBR14/PI<br>staining) (%) | T = 5<br>min  | 9.16 ± 0.72  | 11.07 ± 3.35         | 11.37 ± 4.28          | 12.10 ± 2.60          | 10.56 ± 2.28                    | 11.24 ± 1.89                                            |
|                                  | T = 20<br>min | 14.68 ± 4.37 | 15.58 ± 3.61         | 14.16 ± 3.66          | 14.98 ± 3.97          | 15.12 ± 5.28                    | 16.76 ± 4.54                                            |
| Live intact<br>acrosomes (%)     | T = 5<br>min  | 82.87 ± 4.48 | 81.56 ± 4.34         | 80.76 ± 4.58          | 78.94 ± 4.95          | 81.03 ± 4.95                    | 79.96 ± 3.92                                            |
|                                  | T = 20<br>min | 77.00 ± 4.99 | 75.41 ± 5.37         | 77.77 ± 4.55          | 75.23 ± 5.40          | 74.83 ± 5.74                    | 73.39 ± 6.07                                            |
| Ca <sup>2+</sup> (µg/ml)         | T = 5<br>min  | 34.52 ± 0.45 | 34.05 ± 1.16         | 36.83 ± 3.38          | 33.60 ± 0.77          | 34.68 ± 0.43                    | 33.29 ± 0.48                                            |
|                                  | T = 20<br>min | 37.54 ± 3.51 | 34.41 ± 0.71         | 34.09 ± 0.82          | 34.41 ± 0.79          | 35.39 ± 1.48                    | 34.41 ± 1.48                                            |
