# Supplementary material for: Chemerin Impairs In Vitro Testosterone Production, Sperm Motility, and Fertility in Chicken: Possible Involvement of Its Receptor CMKLR1
Source: MDPI journal article supplement (doi:10.3390/cells9071599), 2020-07-01

A.

|         |     |                |                 |              |           |          |         |          |        |                   |        |     |
|---------|-----|----------------|-----------------|--------------|-----------|----------|---------|----------|--------|-------------------|--------|-----|
| Chicken | 1   | MALSNLSEYS     | DDSDTY-DYLDYTYE | EPGSV        | WTGPSYD   | PKD--    | VARI    | LSVVIYSV | SCVLGI | 57                |        |     |
| Human   | 1   | MEDEDYNTSISYG  | DEYPDYLD        | -----        | SIVVLEDLS | PLEARV   | TRIFL   | VVVSIV   | CFGLI  | 53                |        |     |
| Chicken | 58  | LGNGLVIAI      | IITLKM          | KKS          | VNAIWFLNL | AVADFLFN | IFLPINI | IAYTAM   | RYNWIF | GTVMCKLN          | 117    |     |
| Human   | 54  | LGNGLVII       | IATFKM          | KKTVN        | MMVWFLNL  | AVADFLFN | VFLPIHI | ITYAAMD  | YHWVFG | TAMCKIS           | 113    |     |
| Chicken | 118 | SFLLILNMY      | TSVLLLT         | TISFDRYV     | SVVFPVWS  | QNHRS    | TNLACM  | VCLIIW   | MVGIIM | SCPSL             | 177    |     |
| Human   | 114 | NFLLIHNM       | FTSVFLLT        | TISSDRCI     | SVLLPVWS  | QNHRS    | VRLAYM  | ACMVIW   | VLAFFL | SSPSL             | 173    |     |
| Chicken | 178 | VFRDTAQARNS    | IICFSN          | FSLSRNRS     | -----     | YQALALV  | RHRTV   | NI       | TRLFAG | FLLPITI           | 229    |     |
| Human   | 174 | VFRDTANLHGK    | ISCNN           | FSLSTPG      | SSSWPTH   | SQMDPV   | GYSRHM  | VTV      | TRFLC  | GFLVPVLI          | 233    |     |
| Chicken | 230 | ITFCYIS        | IALNLRRN        | RLAKSKK      | PFKII     | IVTII    | IVTFFLC | WSPYHL   | LNILE  | TEPDLT            | PRSVFE | 289 |
| Human   | 234 | ITACYLT        | IVCKLQRN        | RLAKTKK      | PFKII     | IVTII    | IITFFLC | WCPYHT   | LNLEL  | HHTAMP            | GSVFS  | 293 |
| Chicken | 290 | IGVPIT         | TALAAS          | NSCMNP       | LYVFMG    | QDFKKFKV | TILSRL  | VNALSE   | ETGHSS | IV- <b>HRSFSK</b> | 348    |     |
| Human   | 294 | LGLPLA         | TALAI           | NSCMNP       | ILYVFMG   | QDFKKFKV | ALFSRL  | VNALSE   | DTGHSS | YPSHRS            | FTK    | 353 |
| Chicken | 349 | <b>MSSMTEK</b> | -----           | <b>ETTVL</b> |           |          |         |          |        |                   | 360    |     |
| Human   | 354 | <b>MSSMNER</b> | TSMNER          | ETGML        |           |          |         |          |        |                   | 371    |     |

B.

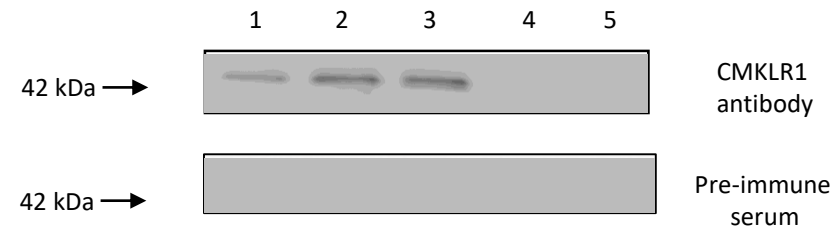

Supplement: s1 [file s1]
